# Supplementary material for: Serum-Mediated Oxidative Stress from Systemic Sclerosis Patients Affects Mesenchymal Stem Cell Function
Source: PubMed Central journal article supplement (PMC5585199; doi:10.3389/fimmu.2017.00988), 2017-09-01
Supplement: table_1.pdf [file table_1.pdf]

Supl Table 1: Primer sequences

| Genes                | Forward                   | Reverse                     |
|----------------------|---------------------------|-----------------------------|
| p27                  | ATAAGGAAGCGACCTGCAACCG    | TTCTTGGGCGTCTGCTCCACAG      |
| p21                  | AGGTGGACCTGGAGACTCTCAG    | TCCTCTTGGAGAAGATCAGCCG      |
| p16                  | GAAGGTCCTCAGACATCCCC      | CCCTGTAGGACCTTCGGTGAC       |
| SOD2                 | CTGGACAAACCTCAGCCCTAAC    | AACCTGAGCCTTGGACACCAAC      |
| TFG $\beta$ RII      | TGGGCTTCCCTGCGTCTGG       | CTTGCAGTTCCACCTGCCCA        |
| COL I                | CCTGGATGCCATCAAAGTCT      | CGCCATACTCGAACTGGAAT        |
| A-Sma                | CATCGGGATGGAGTCTGCTG      | AGAAGCATTTCGGTGGACA         |
| Col III              | GTGAACCTGGGCAAGCTGGT      | GGCCTGGTTGACCATCACTG        |
| TGF $\beta$ 1        | GCCATGAGAAGCAGGAAAGGCCGGT | ACTGCAAGTGGACATCAACGGGTTTAC |
| BCL2                 | CTCGTCGCTACCGTCGTGACTTCG  | CAGATGCCGGTTCAGGTACTCAGTC   |
| BAX                  | TCAGGATGCGTCCACCAAGAAG    | TGTGTCCACGGCGGCAATCATC      |
| RPS9                 | GATTACATCCTGGGCCTGAA      | ATGAAGGACGGGATGTTTAC        |
| COL2a1 $\Delta$<br>2 | CAGACGCTGGTGCTGCT         | TCCTGGTTGCCGGACAT           |
| SOX9                 | AGGTGCTCAAAGGCTACGAC      | GTAATCCGGGTGGTCCTTCT        |
| ACAN                 | TCGAGGACAGCGAGGCC         | TCGAGGGTGTAGCGTGTAGAGA      |
| LPL                  | GTCCGTGGCTACCTGTCATT      | TGGATCGAGGCCAGTAATTC        |
| PPAR- $\gamma$       | CCAGAAAGCGATTCTTAC        | TGCAACCACTGGATCTGTTC        |
| FABP4                | ATGGGATGGAAAATCAACCA      | GTGGAAGTGACGCCTTTCAT        |
